# Supplementary material for: Design, Synthesis and Anticancer Activity of Novel 3,6-Diunsaturated 2,5-Diketopiperazines
Source: Preprints.org preprint supplement (doi:10.20944/preprints202304.1053.v1), 2023-04-27
Supplement: Supplementary file 1 [file supplementary]

**Supporting Information**

**Design, synthesis and anticancer activity of novel 3,6-diunsaturated 2,5-diketopiperazines**

**Xiaolin Li 1,5,†, Tianrong Xun 3,†, Huayan Xu 2, Xiaoyan Pang 1, Bin Yang 1,5, Junfeng Wang 1,5, Xuefeng Zhou 1,5, Xiuping Liu 1, Suiyi Tan 4,*, Yonghong Liu1,2,5,* and Shengrong Liao 1,5,***

1 CAS Key Laboratory of Tropical Marine Bio-Resources and Ecology, Guangdong Key Laboratory of Marine Materia Medica, Research Center for Marine Microbes, South China Sea Institute of Oceanology, Chinese Academy of Sciences, Guangzhou 510301, China

2 Wuya College of Innovation, Shenyang Pharmaceutical University, Shenyang 110016, China

3 Department of Pharmacy, Southern Medical University, Shenzhen 518100, China.

4 Guangdong Provincial Key Laboratory of New Drug Screening, School of Pharmaceutical Sciences, Southern Medical University, Guangzhou 510515, China

5 University of Chinese Academy of Sciences, Beijing 100049, China

***** Correspondence: suiyitan@smu.edu.cn (S.T.), yonghongliu@scsio.ac.cn (Y.L.), srliao@scsio.ac.cn (S.L.)

† These authors contributed equally to this work

**Copies of NMR spectra for the derivatives**

Note: **3** and **7** are known compounds1-2

Figure **S1** 1H NMR of **1**


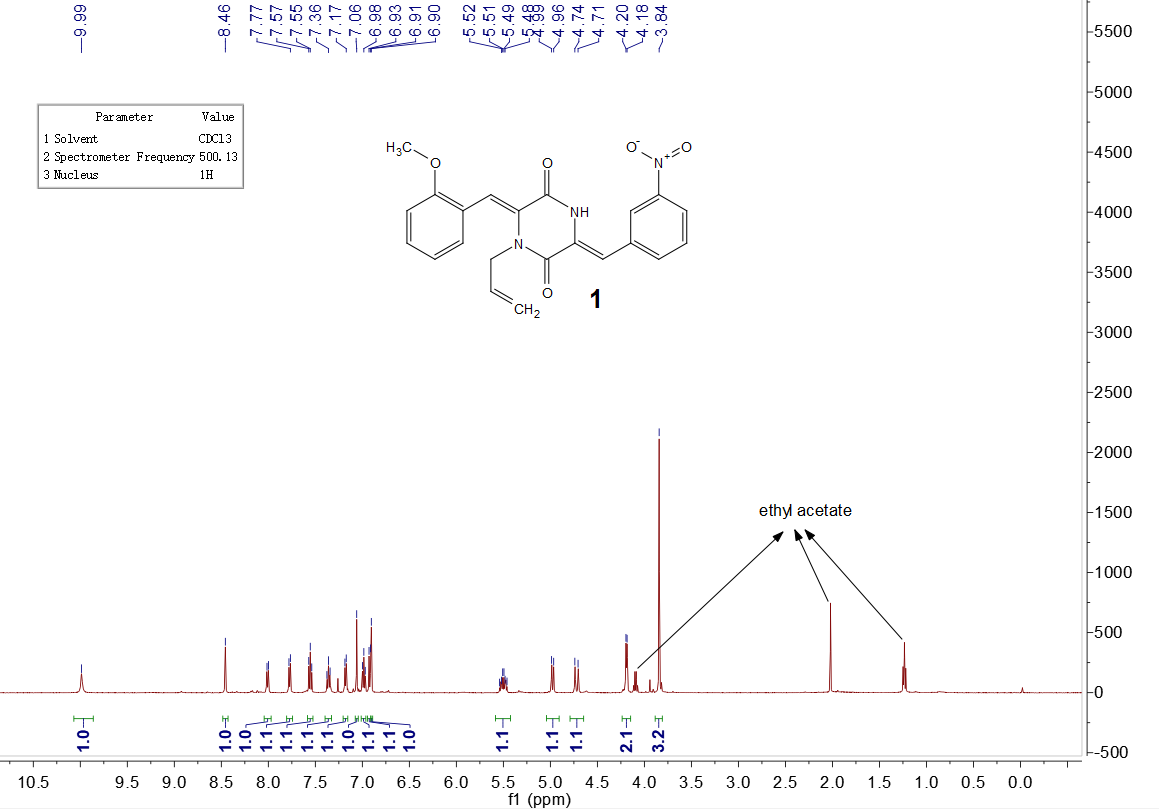


Figure **S2** 13C NMR of **1**


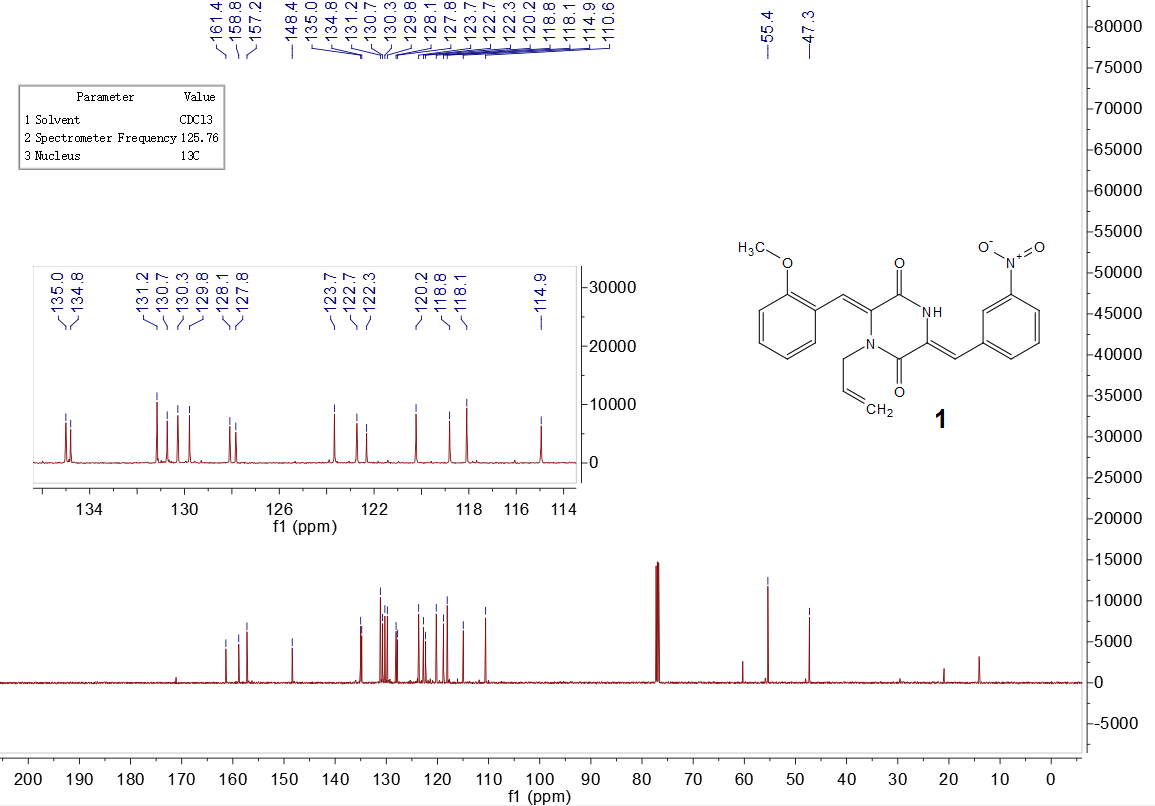


Figure **S3** 1H NMR of **2**


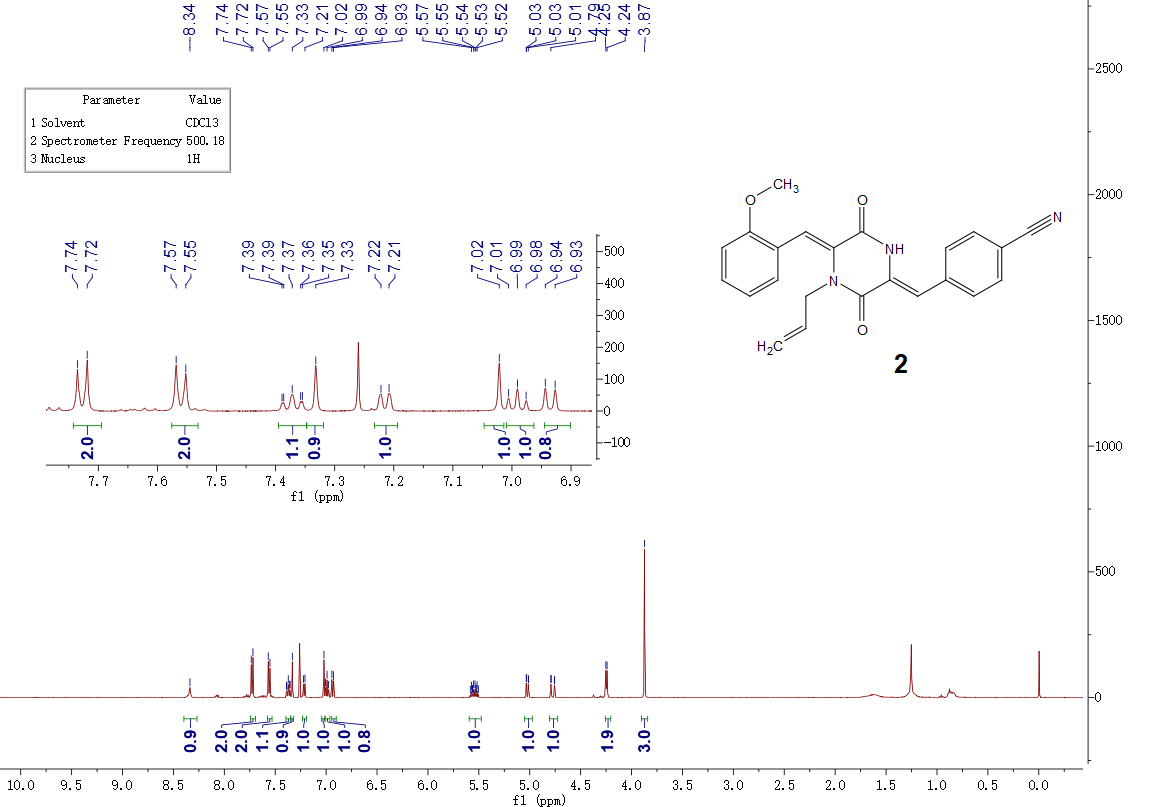


Figure **S4** 13C NMR of **2**
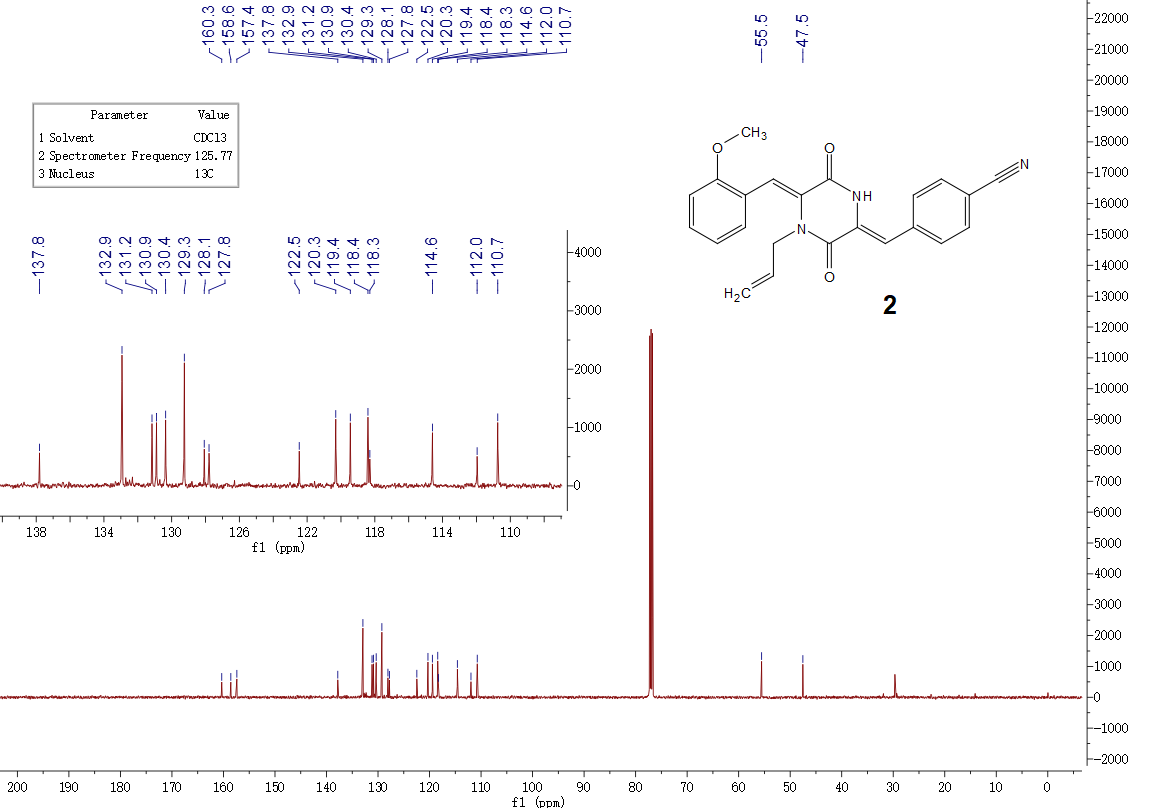


Figure **S5** 1H NMR of **4**


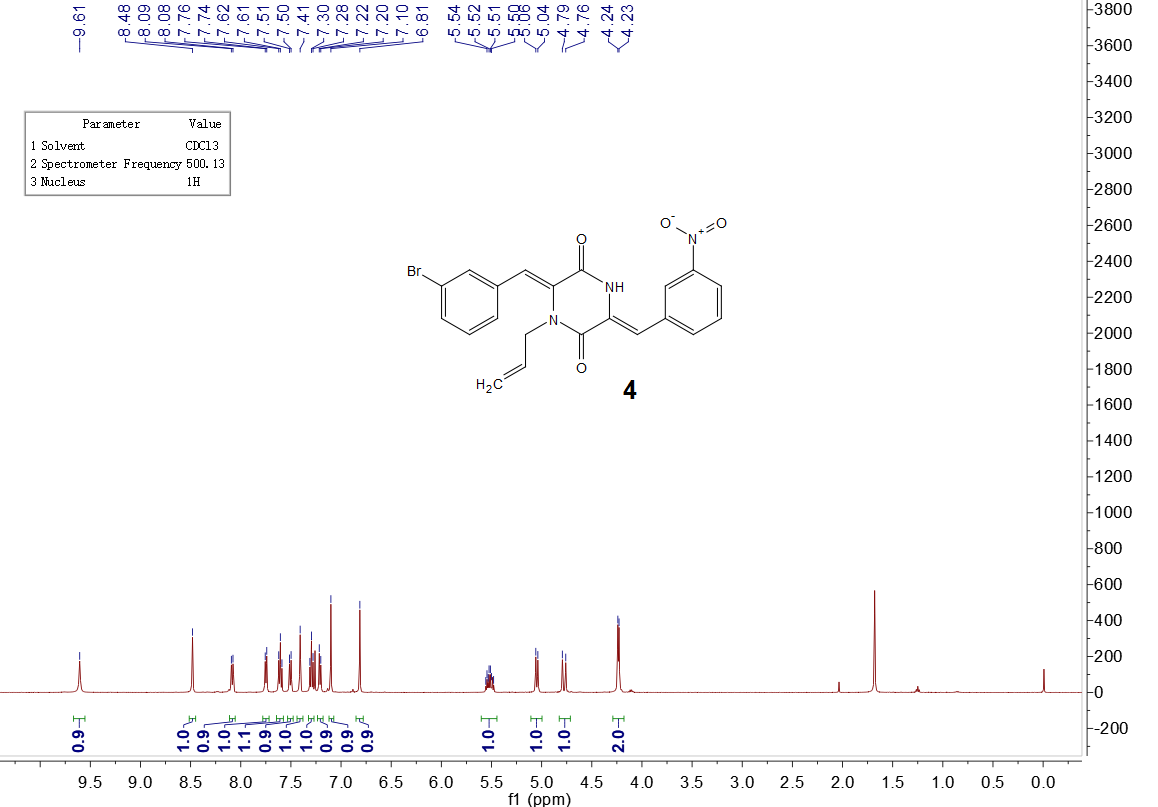


Figure **S6** 13C NMR of **4**


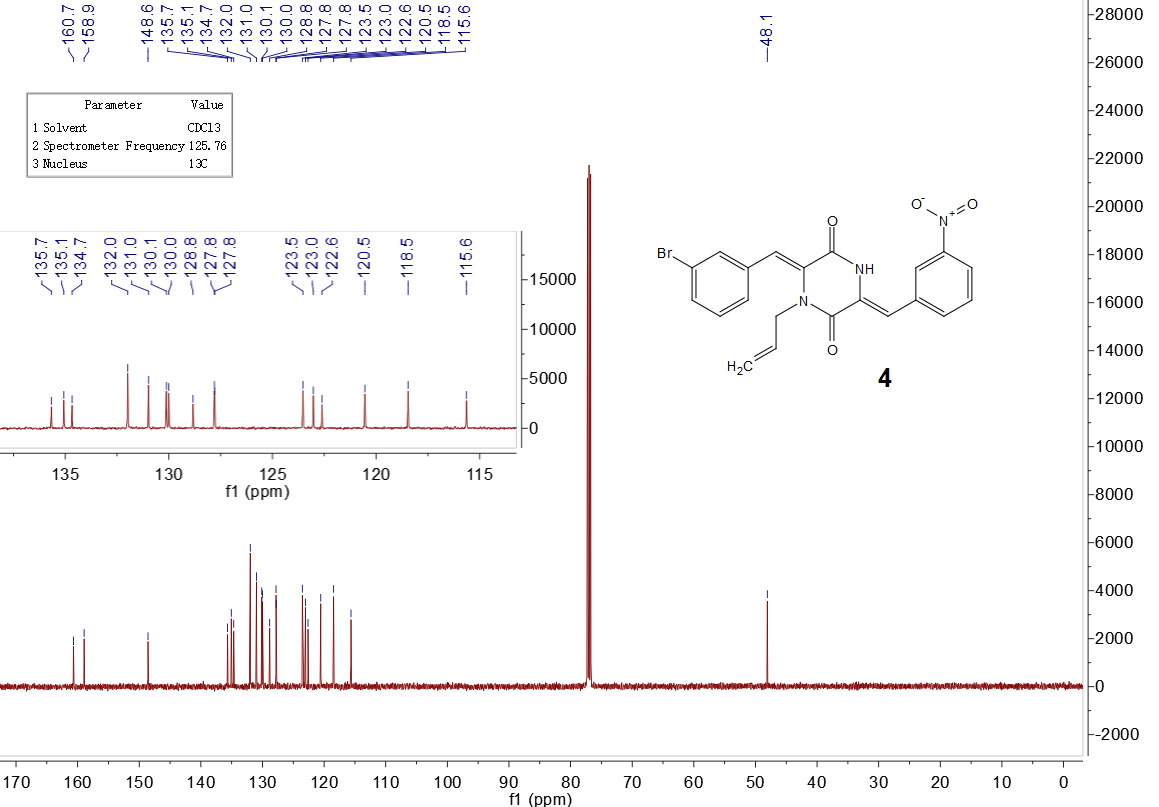


Figure **S7** 1H NMR of **5**


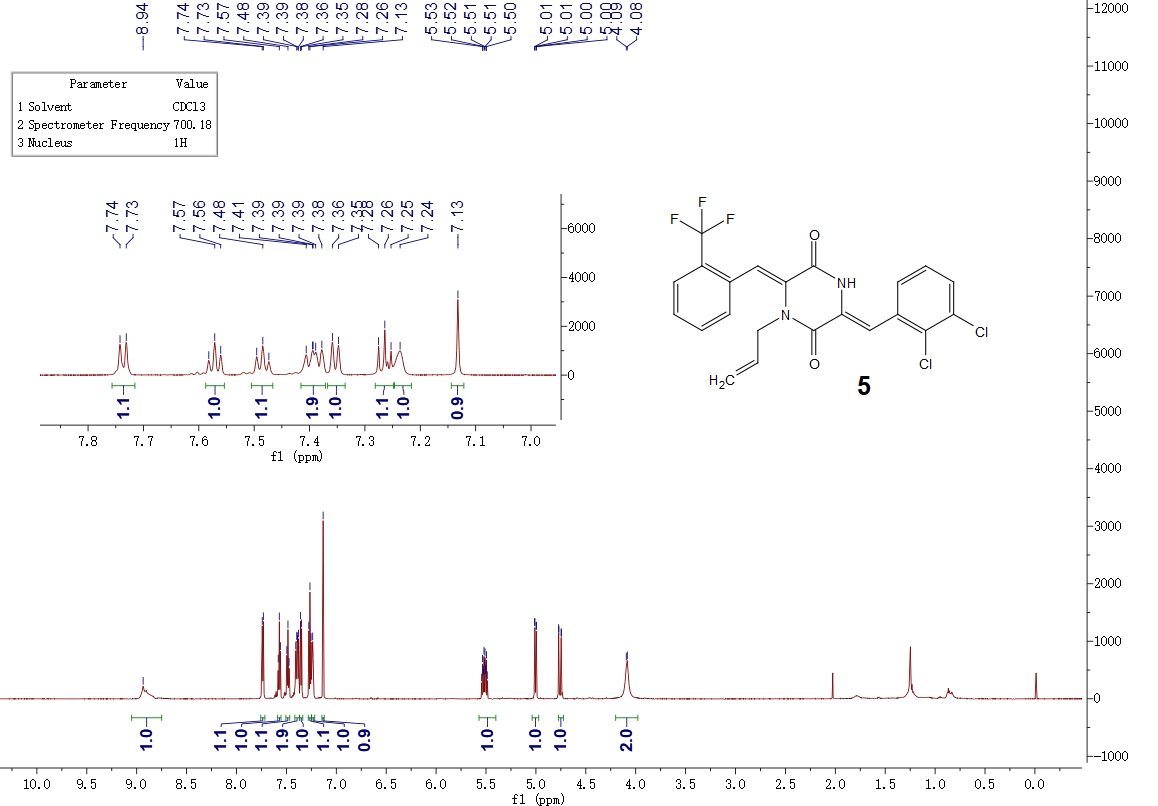


Figure **S8** 13C NMR of **5**


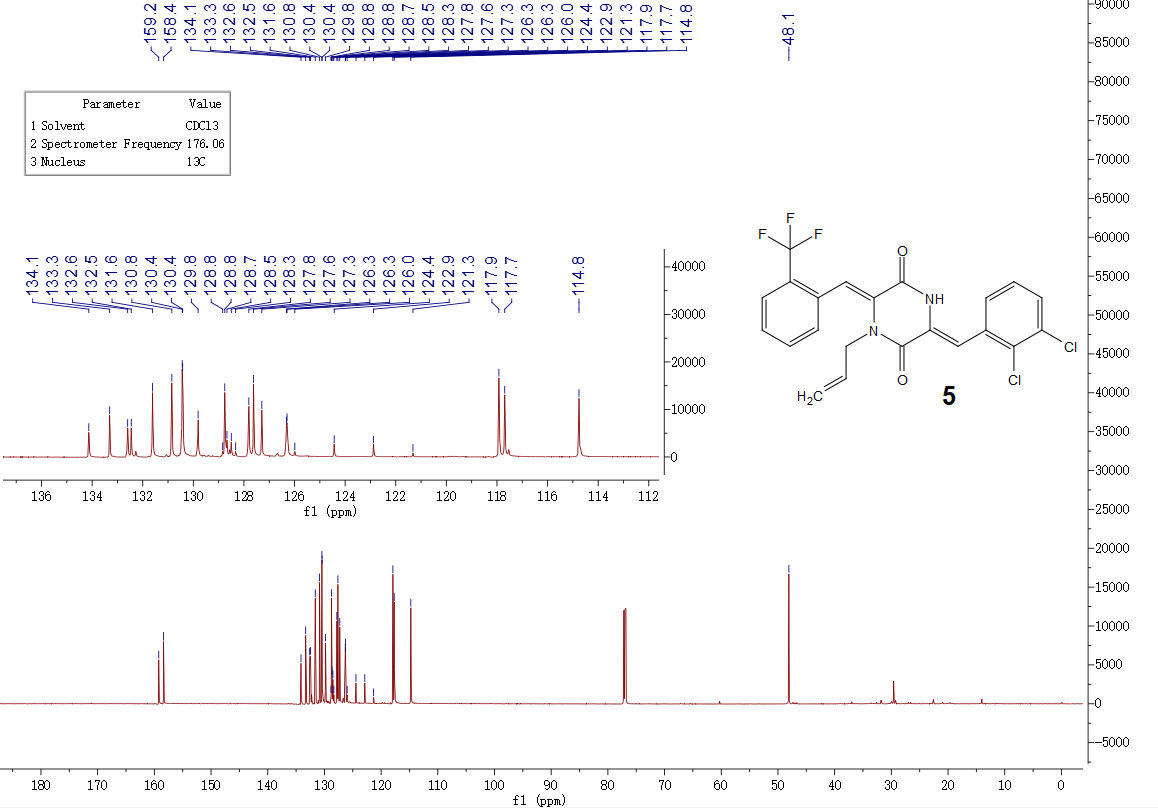


Figure **S9** 1H NMR of **6**


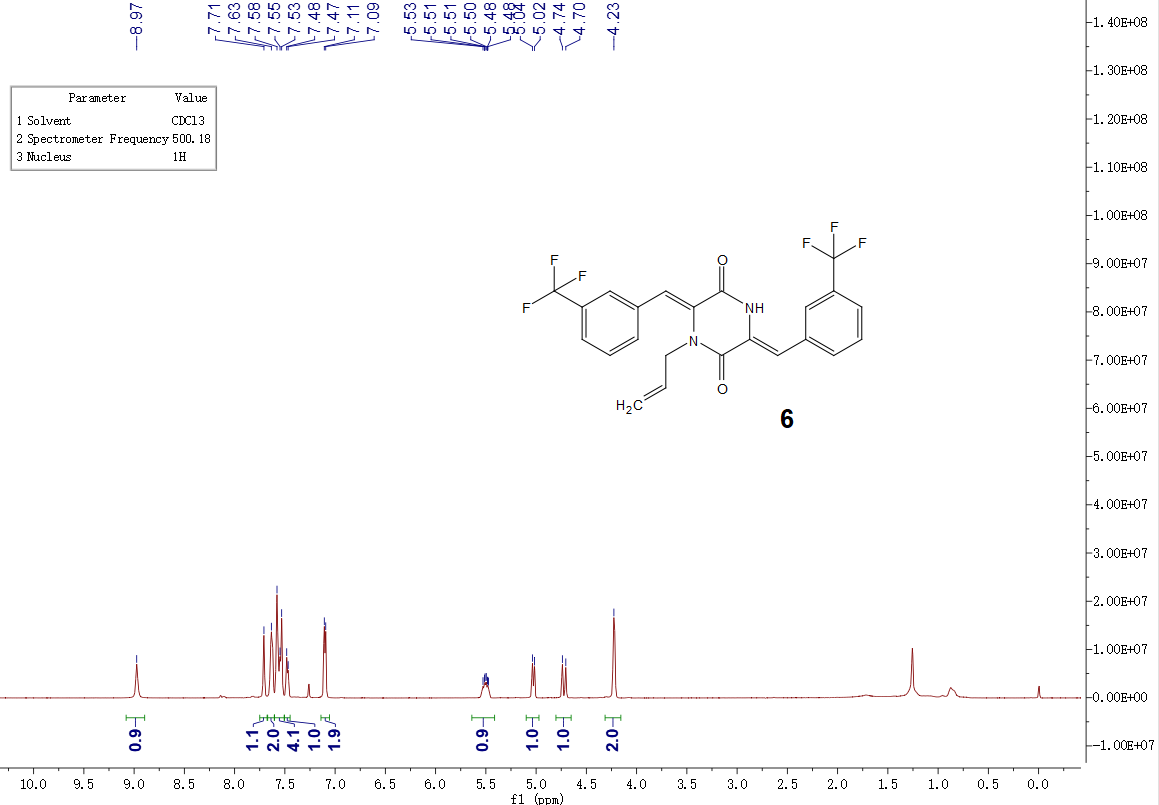


Figure **S10** 13C NMR of **6**


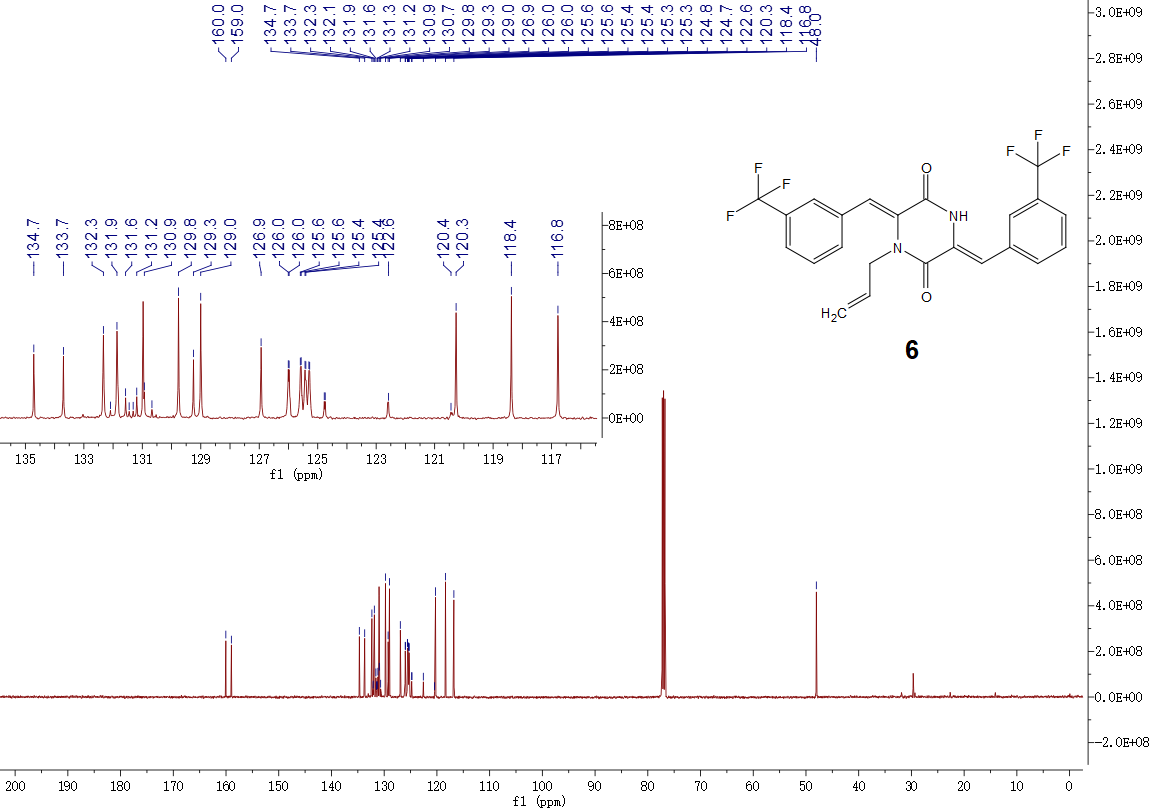


Figure **S11** 1H NMR of **8**


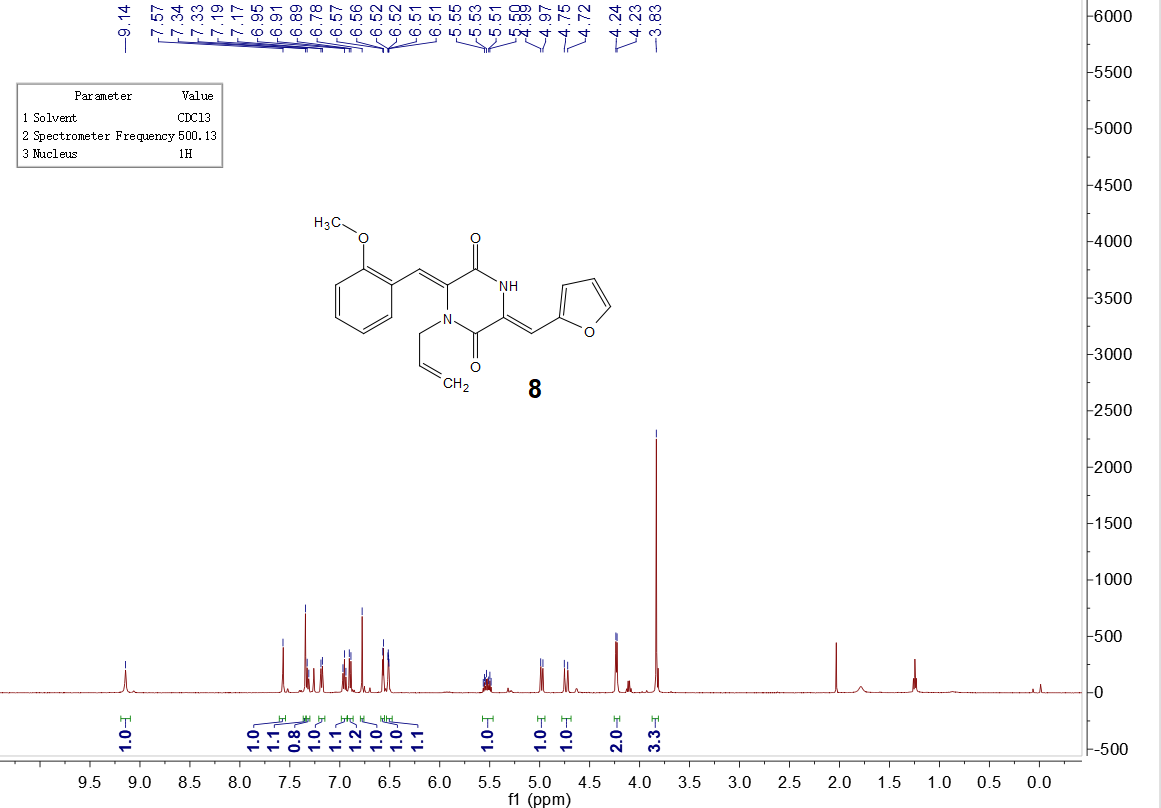


Figure **S12** 13C NMR of **8**


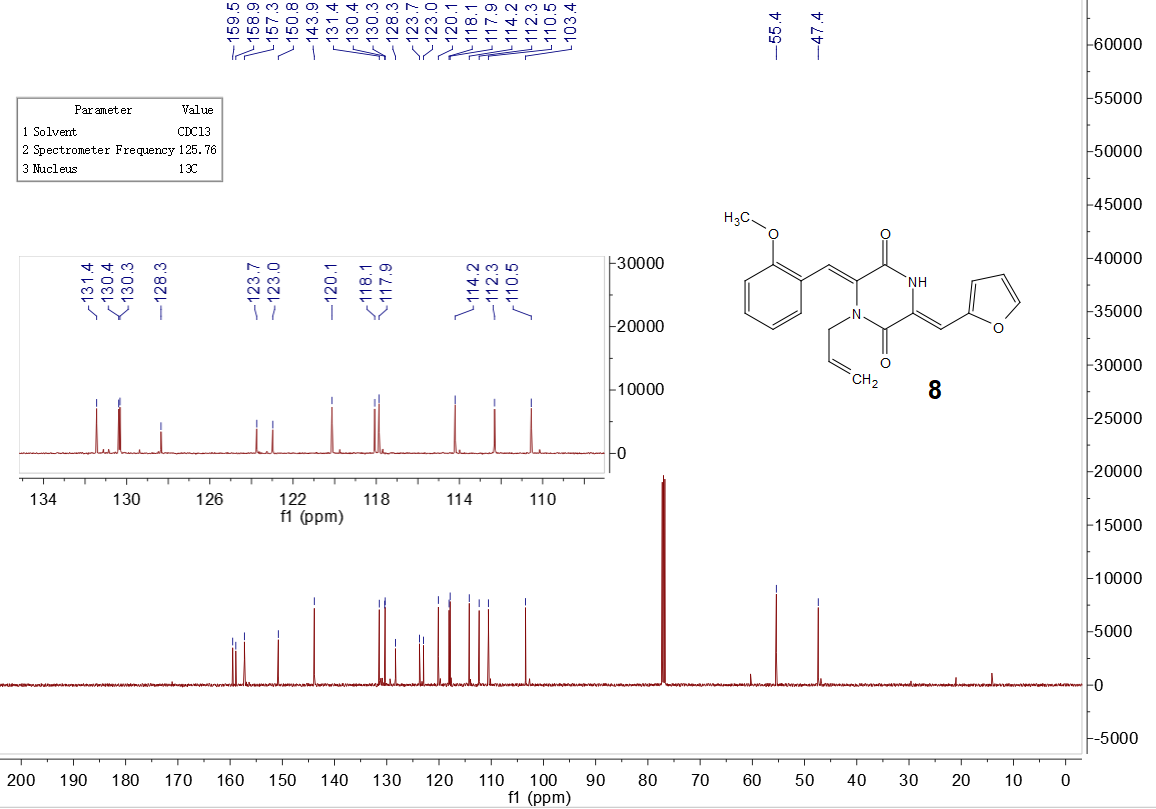


Figure **S13** 1H NMR of **9**


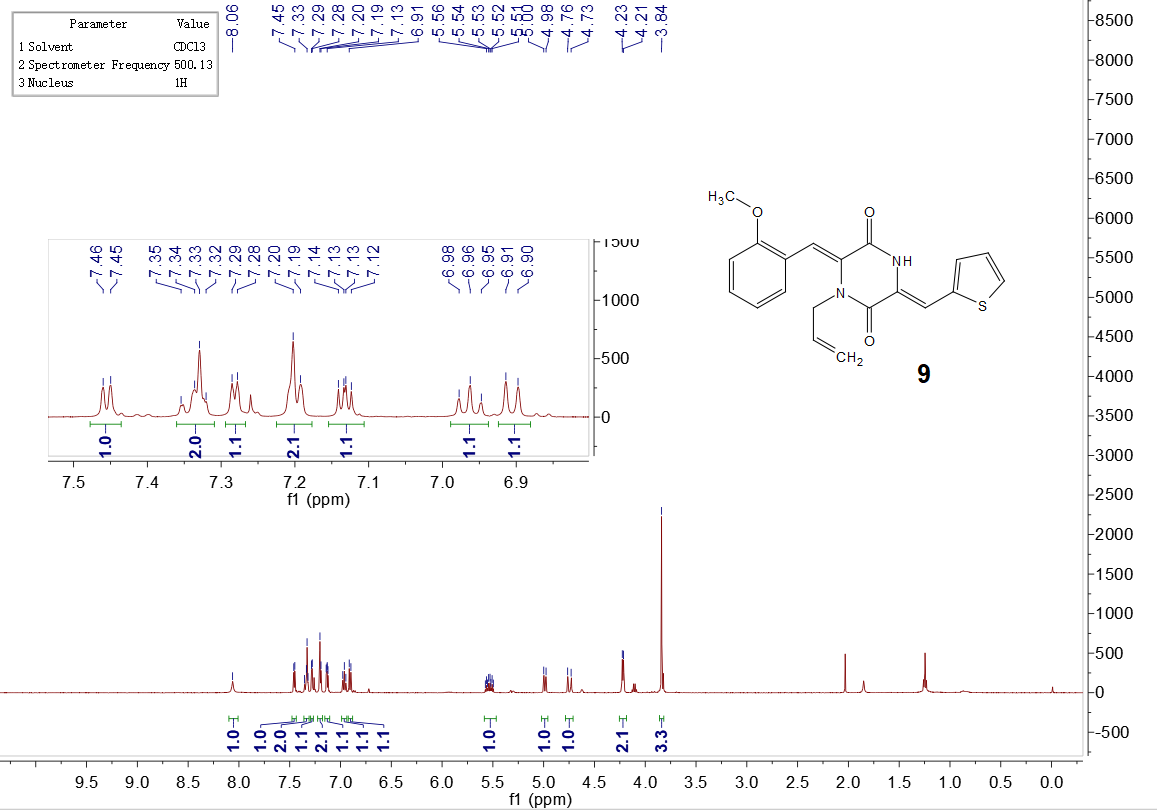


Figure **S14** 13C NMR of **9**


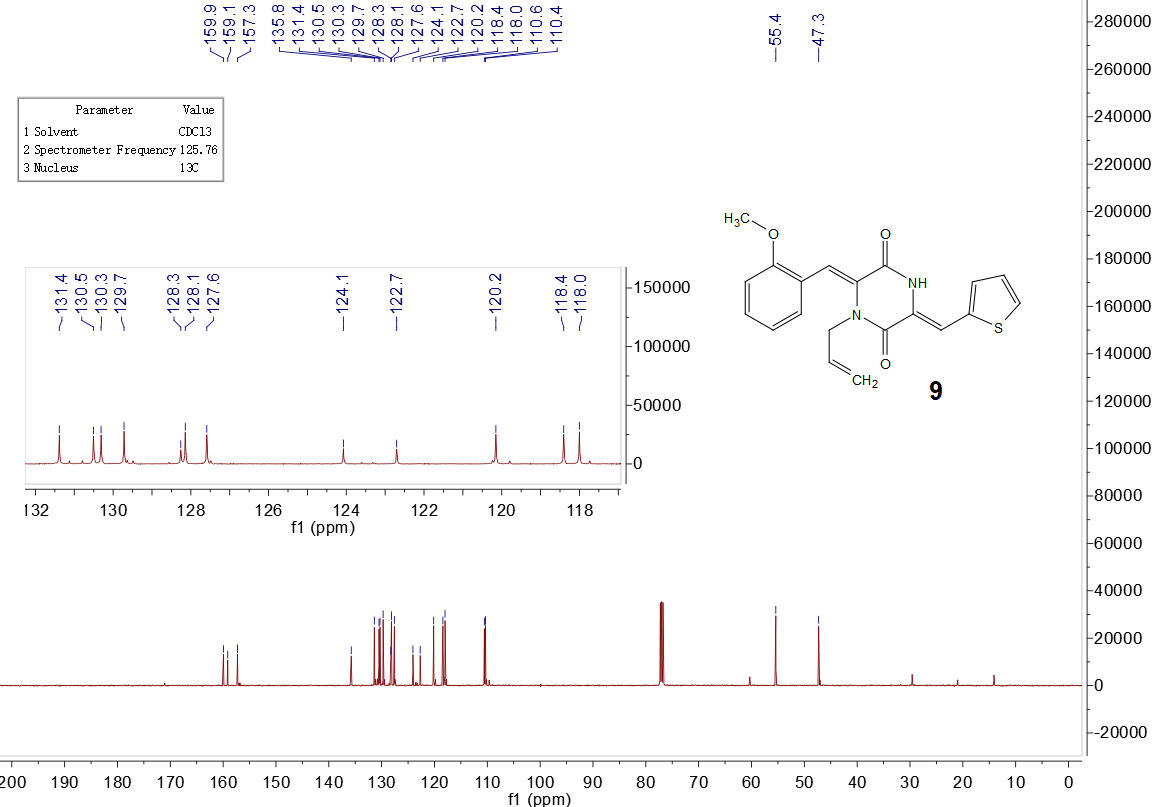


Figure **S15** 1H NMR of **10**


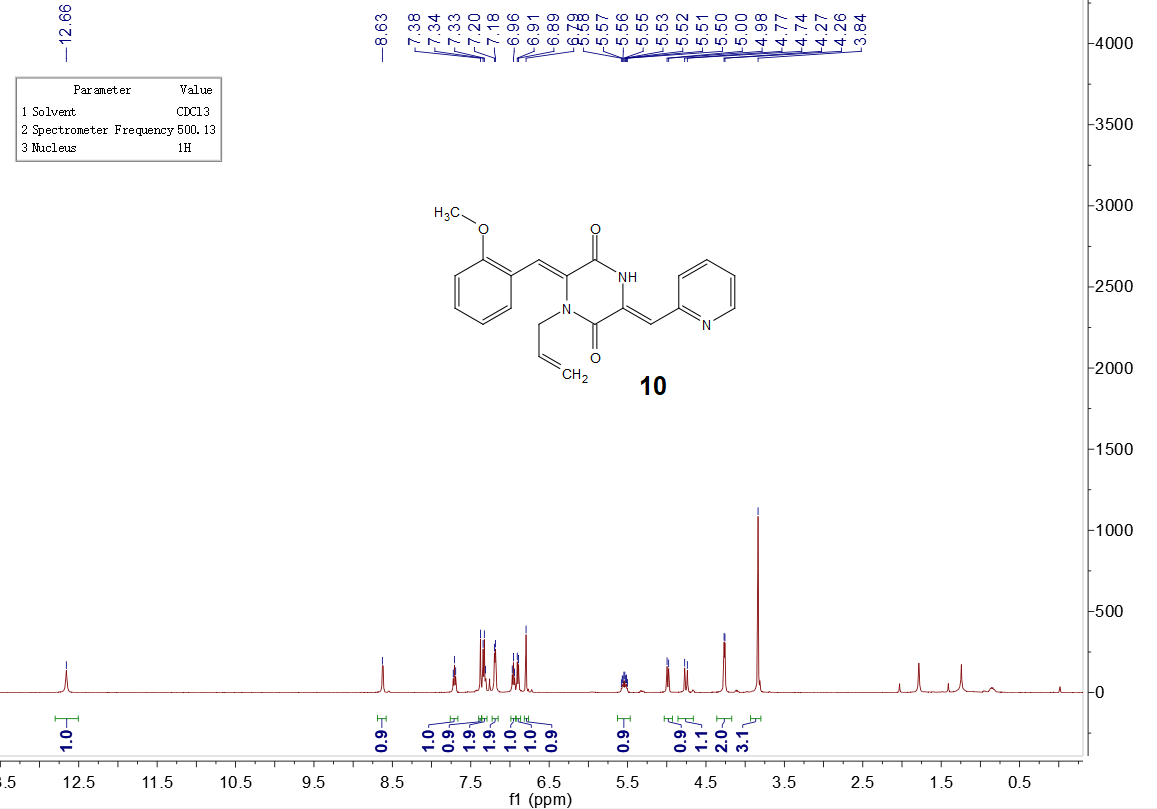


Figure **S16** 13C NMR of **10**
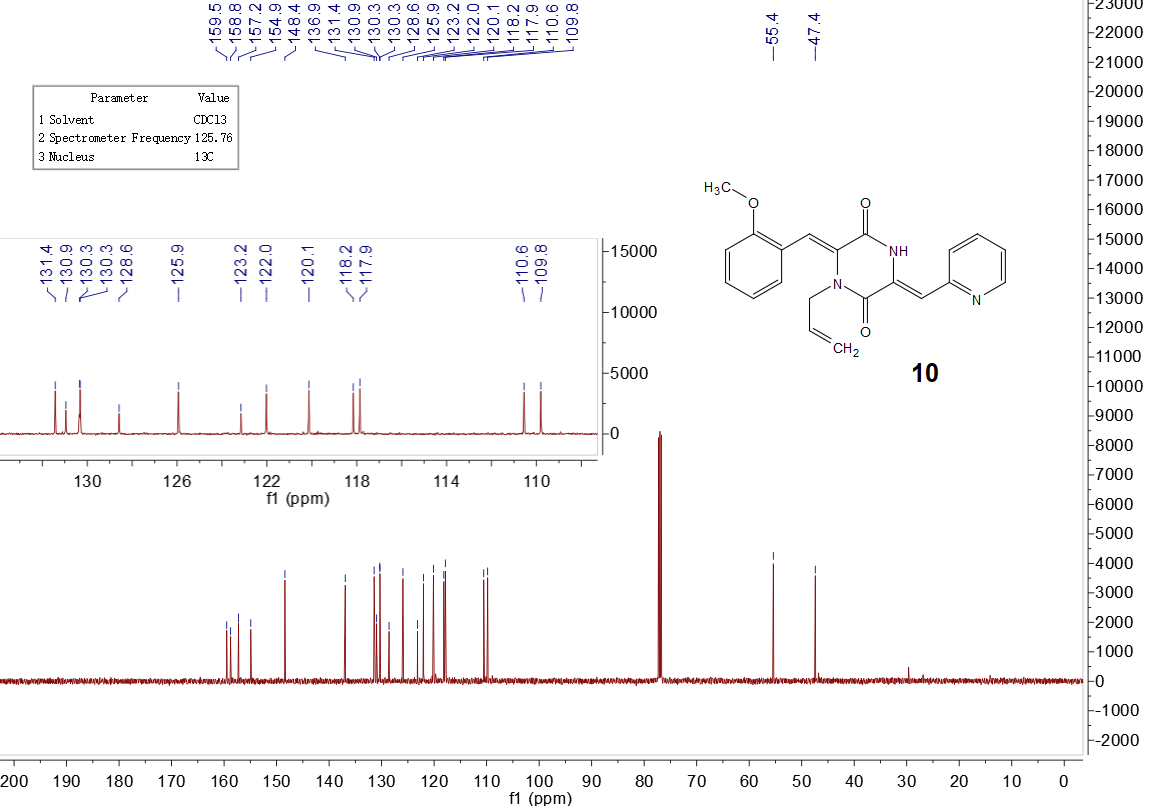


Figure **S17** 1H NMR of **11**


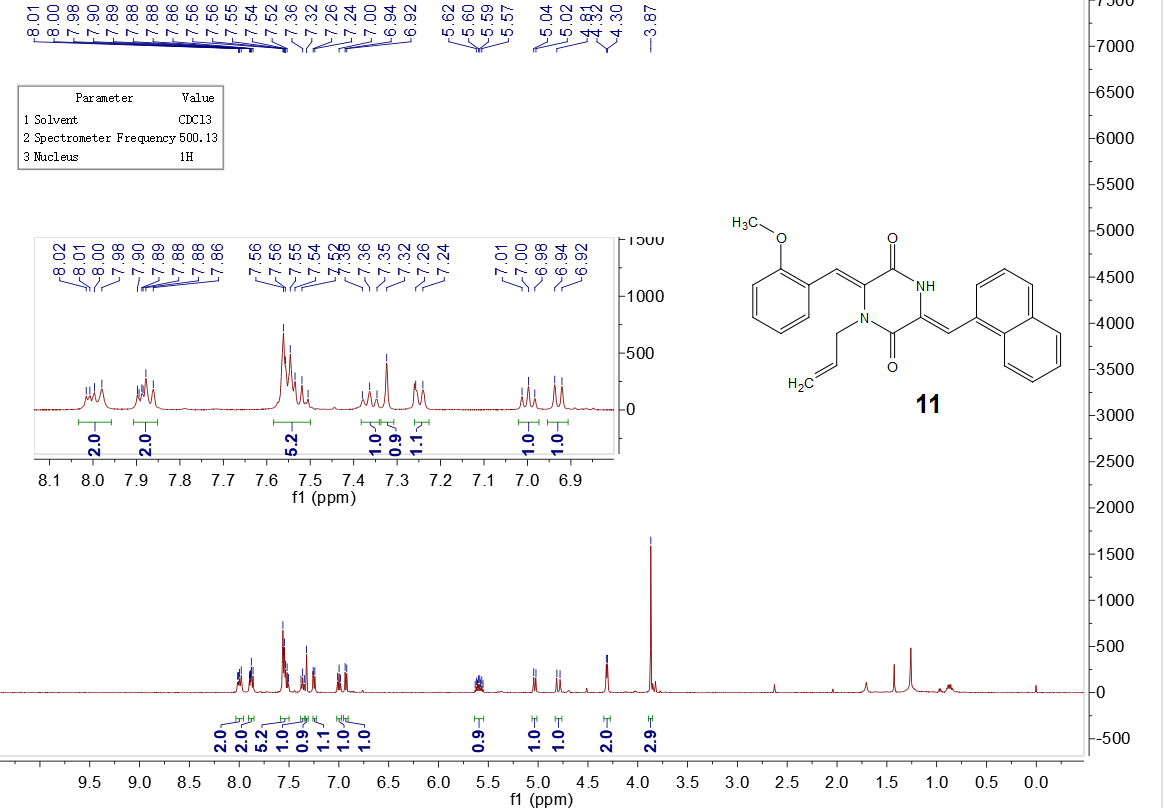


Figure **S18** 13C NMR of **11**
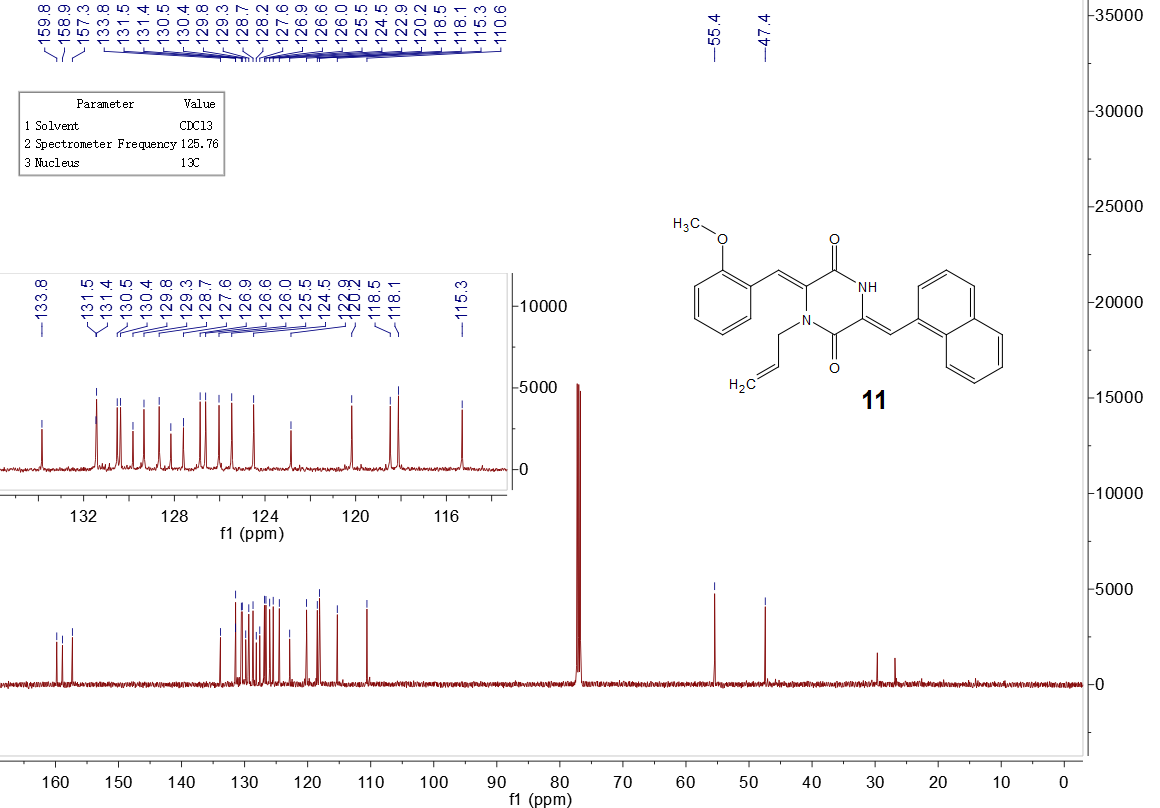


Figure **S19** 1H NMR of **12**


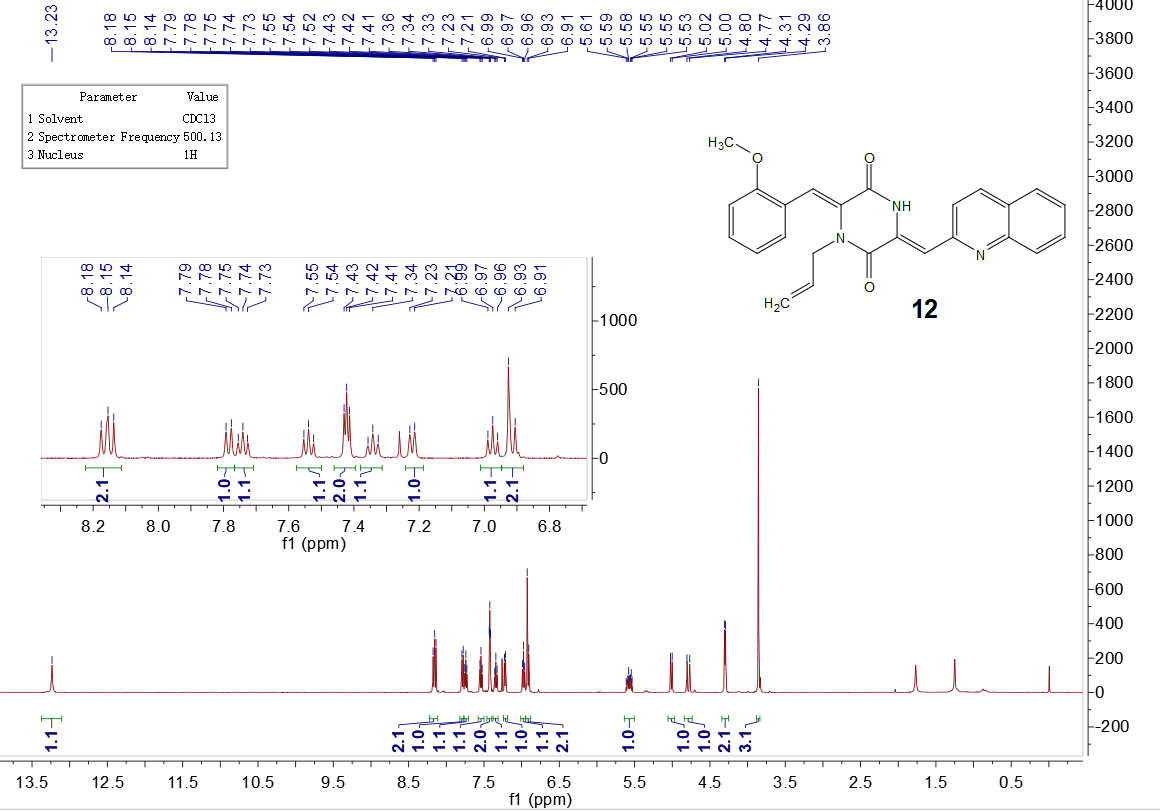


Figure **S20** 13C NMR of **12**
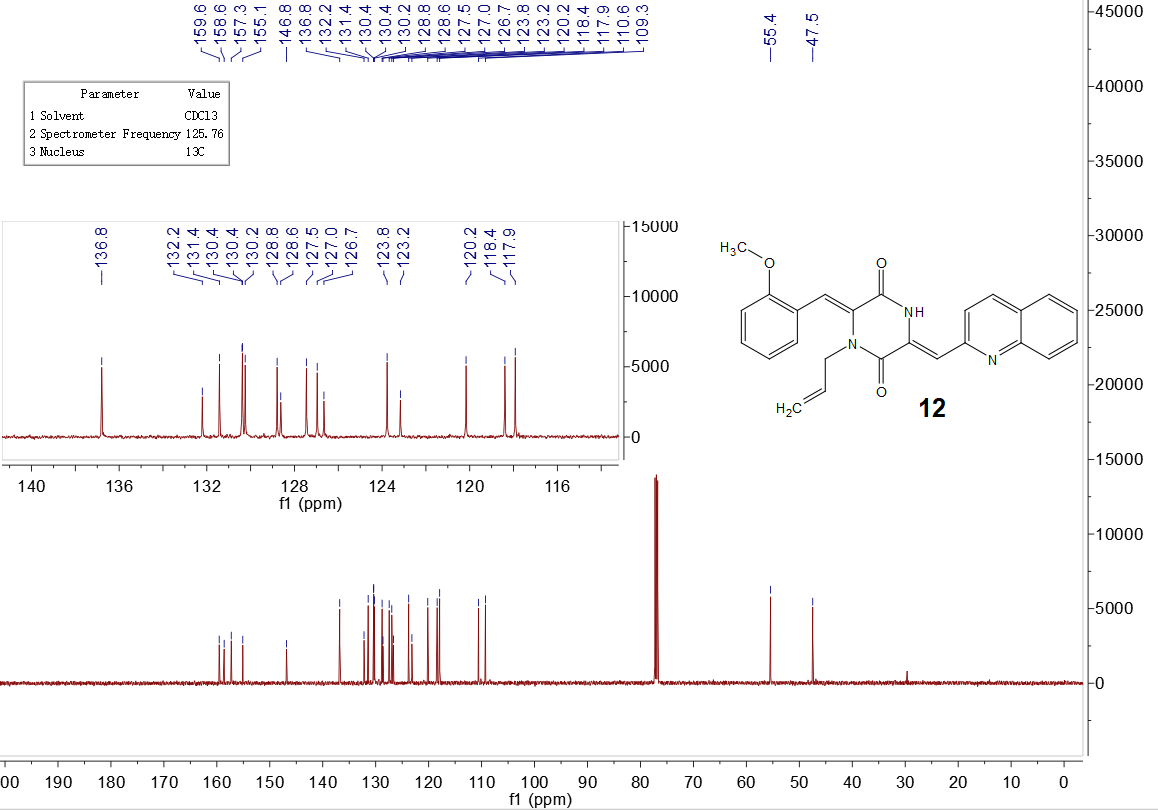


Figure **S21** 1H NMR of **13**


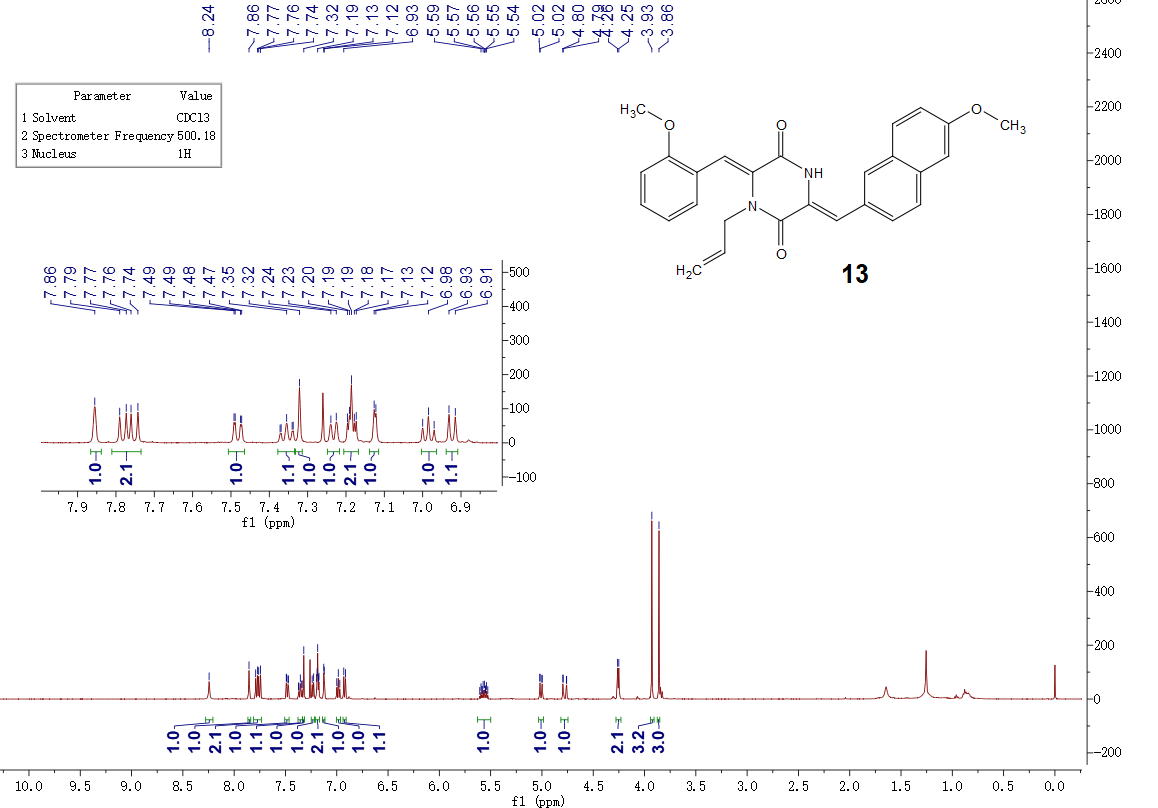


Figure **S22** 13C NMR of **13**


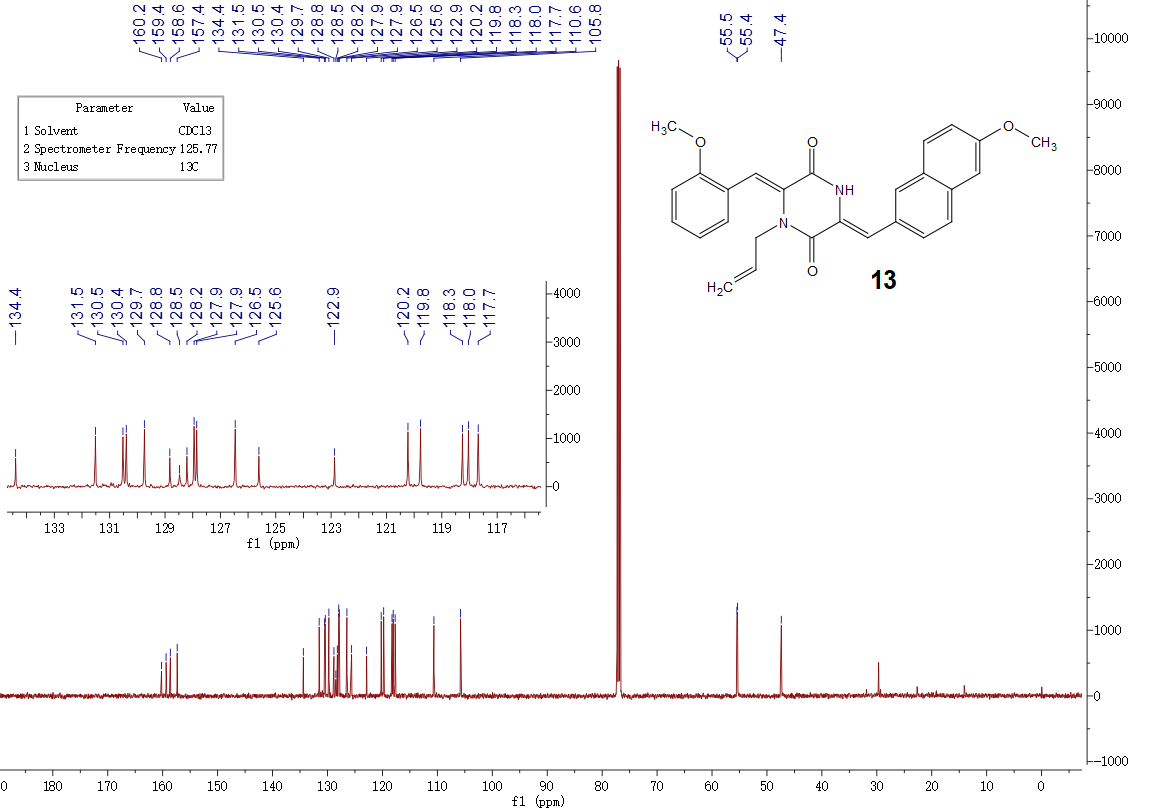


Figure **S23** 1H NMR of **14**


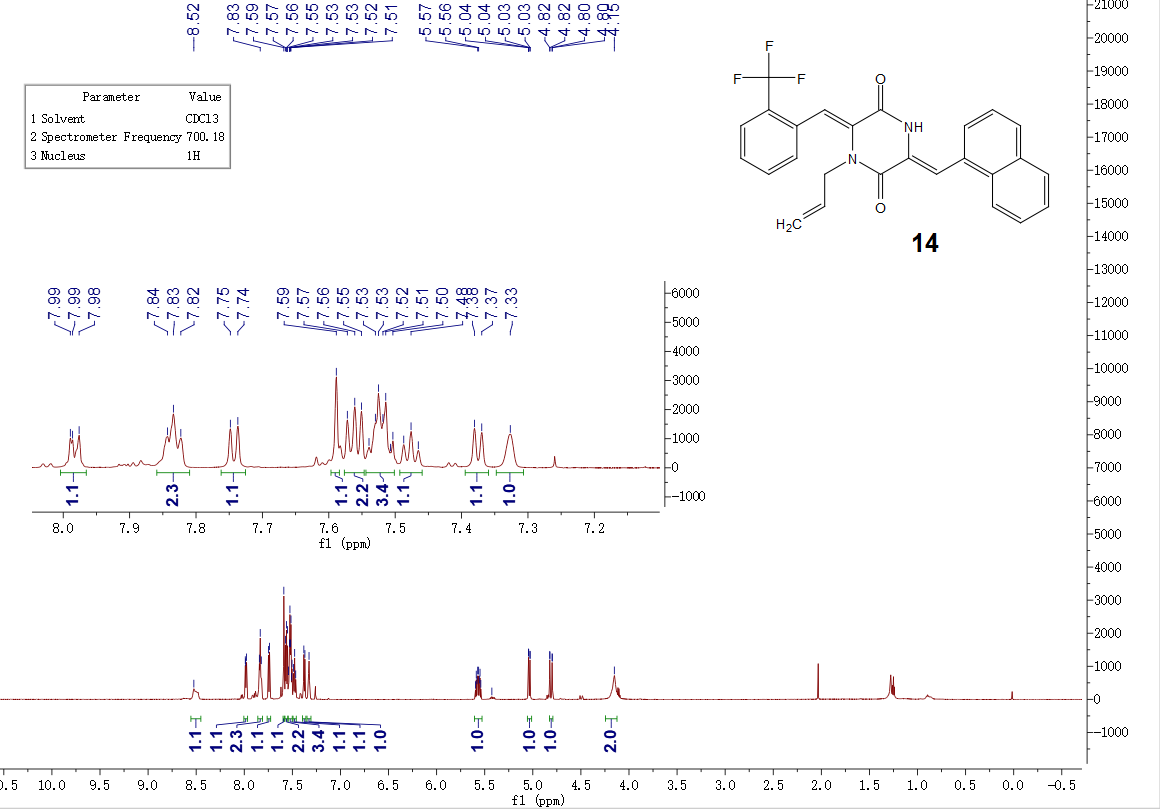


Figure **S24** 13C NMR of **14**


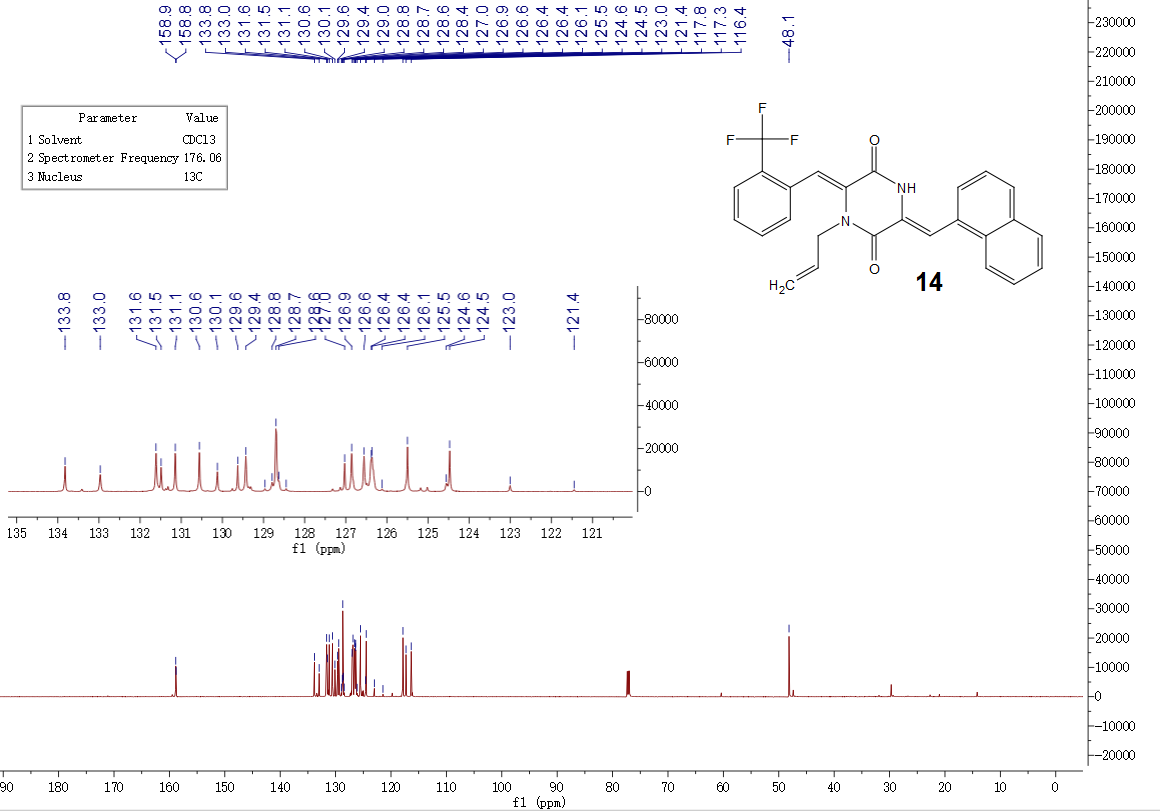


Figure **S25** 1H NMR of **15**


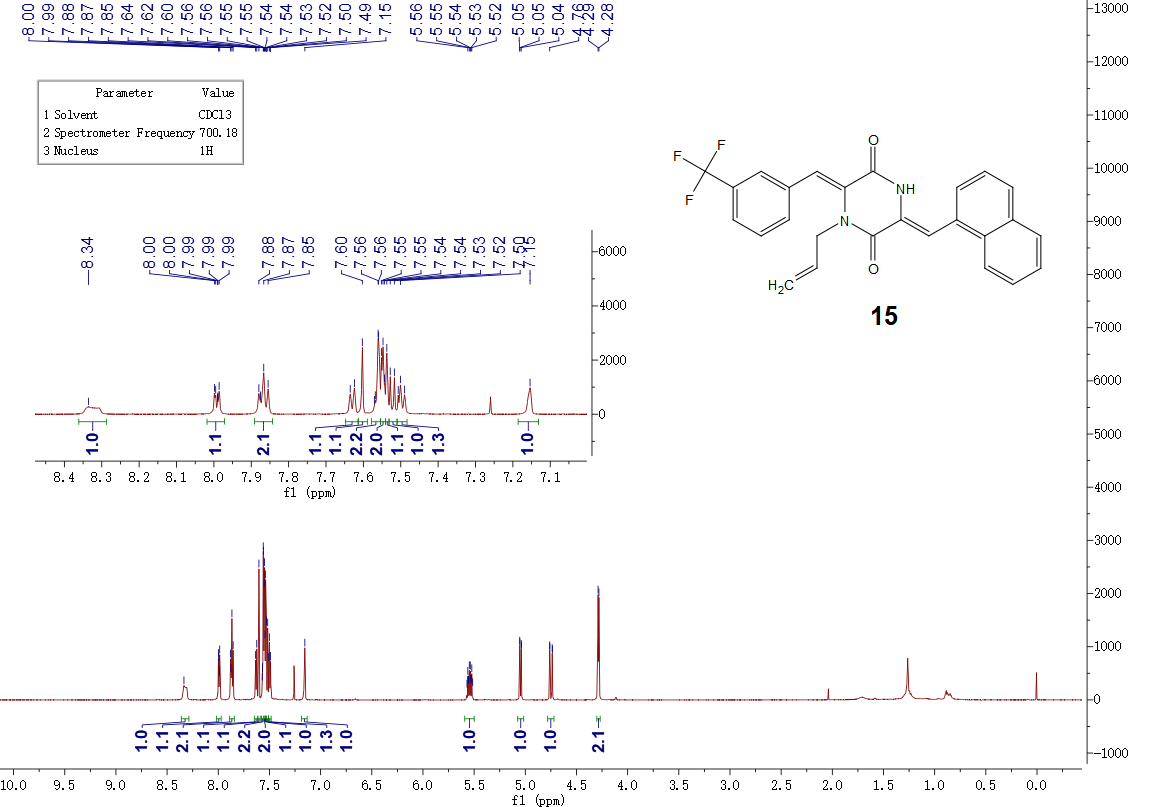


Figure **S26** 13C NMR of **15**


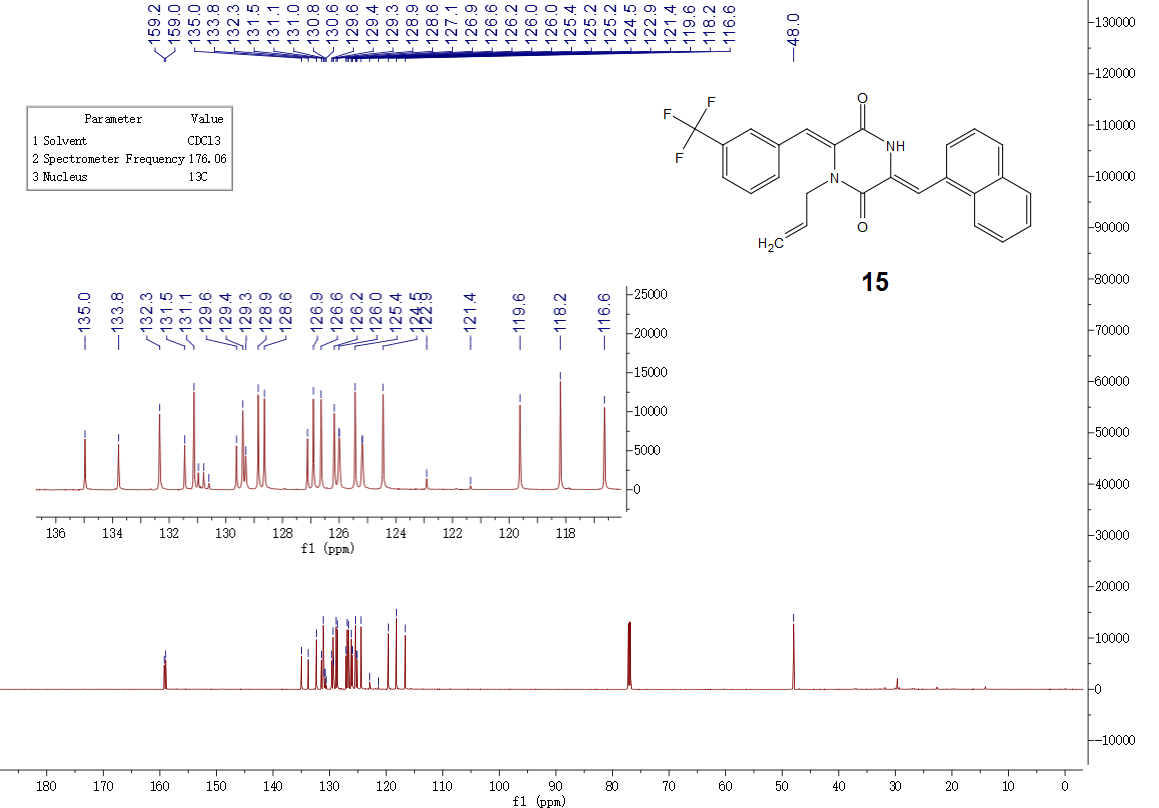


Figure **S27** 1H NMR of **16**


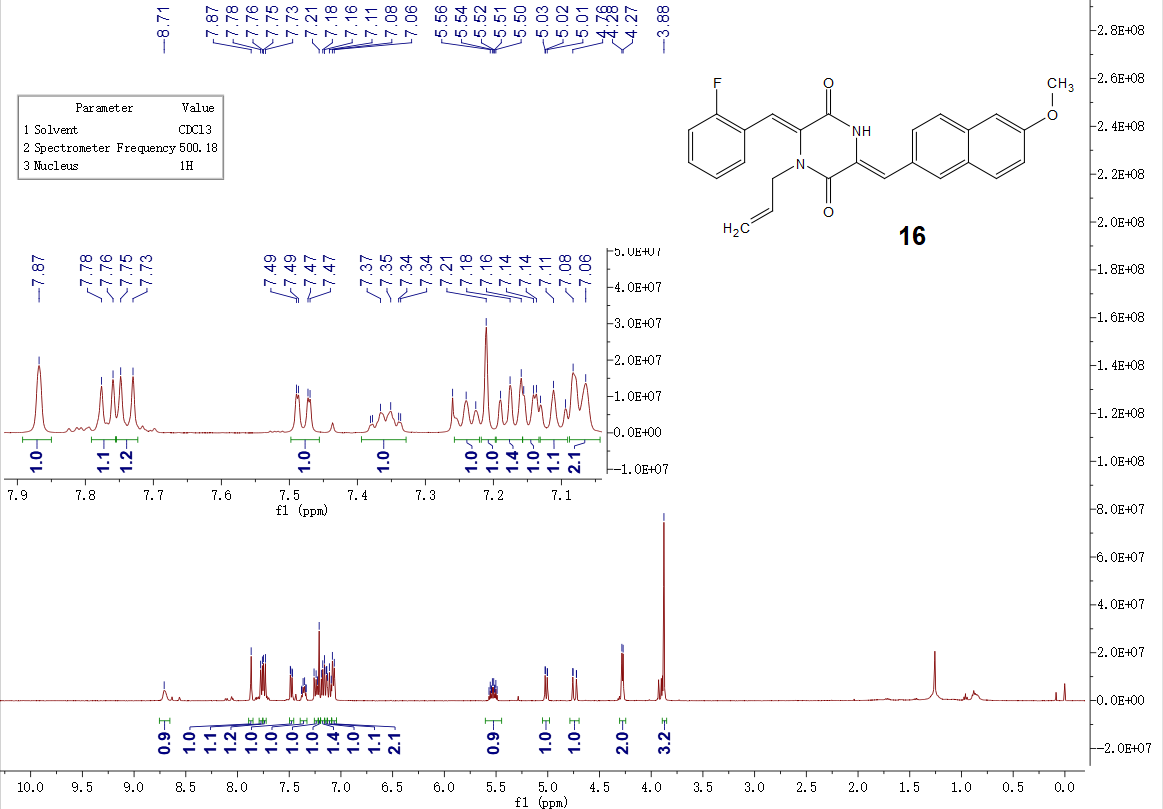


Figure **S28** 13C NMR of **16**


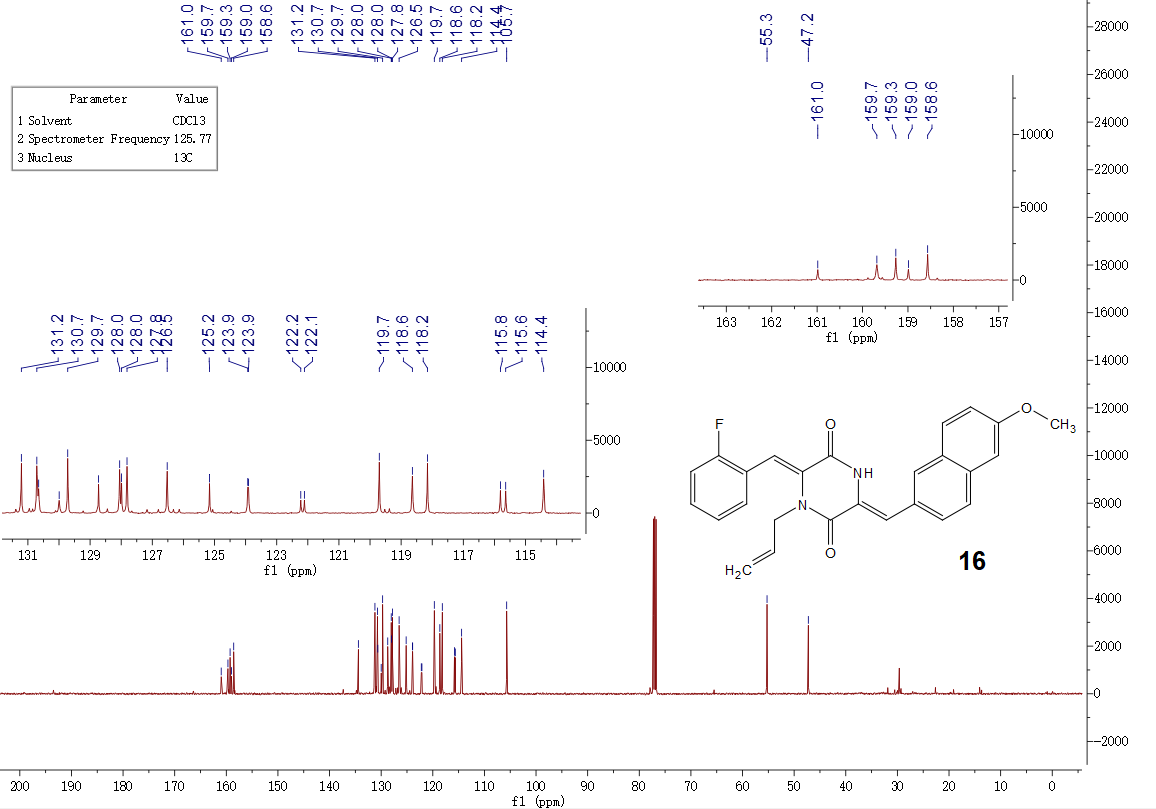


Ref:

1 Liao, S. R.; Du, L. J.; Qin, X. C.; Xu, L.; Wang, J. F.; Zhou, X. F.; Tu, Z. C.; Li, J.; Liu, Y. H., *Tetrahedron* **2016,** 72, (8), 1051-1057.

2 Liao, S. R.; Xu, Y.; Tang, Y.; Wang, J. F.; Zhou, X. F.; Xu, L.; Liu, Y. H., *Rsc Adv* **2015,** 5, (63), 51020-51026.
